# Supplementary material for: Bioaccessibility and unravelling of polyphenols, sulforaphane, and indoles biotransformation after in vitro gastrointestinal digestion of a novel lactofermented broccoli beverage
Source: Royal Society of Chemistry journal article supplement (doi:10.1039/d4fo03528c), 2024-01-01
Supplement: d4fo03528c1.pdf [file d4fo03528c1.pdf]

### SUPPLEMENTARY TABLE

**Table 1S.** List of putative polyphenolic compounds, sulforaphane, and indoles identified in the optimised lactofermented beverage made from broccoli leaves.

| Tentative identification        | Molecular formula | Precursor ion [m/z] | Product ion [m/z] | Polarity |
|---------------------------------|-------------------|---------------------|-------------------|----------|
| <i>Phenolic acid</i>            |                   |                     |                   |          |
| 3-O-Caffeoylquinic acid         | C16H18O9          | 353                 | 191               | –        |
| 5-O-Caffeoylquinic acid         | C16H18O9          | 353                 | 191               | –        |
| 4-O-Caffeoylquinic acid         | C16H18O9          | 353                 | 191               | –        |
| 1-O-Feruloylquinic acid         | C17H20O9          | 367                 | 191               | –        |
| 5-O-Feruloylquinic acid         | C17H20O9          | 367                 | 191               | –        |
| 1,2-Disinapoylgentiobioside     | C34H42O19         | 753                 | 205               | –        |
| Sinapic acid                    | C11H12O5          | 223                 | 208               | –        |
| Ferulic acid                    | C10H10O4          | 193                 | 178               | –        |
| <i>Deacylated flavonoids</i>    |                   |                     |                   |          |
| K-3,7-O-diGlu                   | C27H30O16         | 609                 | 284               | –        |
| K-3-O-Soph-7-O-D-Glu            | C33H40O21         | 771                 | 284               | –        |
| K-3-O-sophoroside               | C27H30O16         | 609                 | 284               | –        |
| Q-diGlu                         | C27H30O17         | 625                 | 300               | –        |
| <i>Acylated flavonoids</i>      |                   |                     |                   |          |
| K 3-O-hFer-Soph-7-O-Glu         | C45H56O23         | 963                 | 284               | –        |
| K 3-O-Caf-Soph-7-O-Glu          | C42H46O24         | 933                 | 284               | –        |
| K-3-O-Sin-Soph-7-O-Glu          | C44H50O25         | 977                 | 284               | –        |
| K-3-O-FerSoph-7-O-Glu           | C43H48O24         | 947                 | 284               | –        |
| K-3HFerSoph                     | C37H38O20         | 801                 | 284               | –        |
| K-3FeSoph                       | C37H38O19         | 785                 | 284               | –        |
| K-3-O-Caf-Soph-7-O-Sin-Glu      | C53H56O28         | 1140                | 284               | –        |
| K-3CafSoph-7dGlu                | C48H56O29         | 1095                | 284               | –        |
| <i>Sulforaphane and indoles</i> |                   |                     |                   |          |
| Sulforaphane                    | C6H11NOS2         | 178                 | 114               | +        |
| Ascorbigen                      | C15H15NO6         | 306                 | 130               | +        |
| Indole-3-carbinol               | C9H9NO            | 130                 | 77                | +        |
| Diindolylmethane                | C17H14N2          | 247                 | 130               | +        |

Kaempferol (K); Quercetin (Q); Glucoside (Glu); diglucoside (dGlu); Sophoroside (Soph); Sinapoyl (Sin); Feruloyl (Fer); Hydroxyferuloyl (hFe); Caffeoyl (Caf).
